# Supplementary material
Source: Springer Nature journal article supplement (https://www.springermedizin.de/resource/supplementary/12879_2011_1616_MOESM1_ESM.pdf/9442942)
Supplement: MOESM1 [file 9442942]

35 studies in database search

20 Studies excluded on the basis of title and abstract because they were considered as not relevant to study question

15 potentially relevant studies identified

10 studies excluded

- 8 were unsuitable
- 2 did not include sensitivity and specificity of the assay

5 studies were considered eligible for inclusion in the meta-analysis

2 studies included from reference lists

7 studies included
